# Fast targeting of antigen and surface-derived MHCII into degradative compartments implies endosomal prewiring for antigen presentation in B cells

Running title: **B cell early peripheral MIICs**

Hernández-Pérez S<sup>1\*</sup>, Vainio M<sup>1\*</sup>, Kuokkanen E<sup>1</sup>, Sustar V<sup>1</sup>, Rajala J<sup>1</sup>, Paavola V<sup>1</sup>, Petrov P<sup>1</sup>, Awoniyi LO, Sarapulov AV, Försten S<sup>1</sup>, Vihinen H<sup>2</sup>, Jokitalo E<sup>2</sup>, Bruckbauer A<sup>3</sup>, and Mattila PK<sup>1</sup>

<sup>1</sup> Institute of Biomedicine, MediCity Research Laboratories, University of Turku, Finland

<sup>2</sup> Institute of Biotechnology, Electron Microscopy Unit, University of Helsinki, Finland

<sup>3</sup> Facility for Imaging by Light Microscopy (FILM), National Heart and Lung Institute, Imperial College London, UK

\* the authors contributed equally to the study.

**Corresponding author:**

**Pieta Mattila**

Tel: +358 50 574 0780

Fax: +358 2 333 7000

E-mail: [pieta.mattila@utu.fi](mailto:pieta.mattila@utu.fi)

**Keywords:** Adaptive immune system, B cells, antigen processing, B cell receptor, BCR, MHCII, peptide-loading, endosomes, vesicle traffic

**List of Symbols and Abbreviations used:** BCR, B cell receptor; MHCII, major histocompatibility complex Class II; pMHCII, peptide-MHCII; MIIC, MHCII peptide-loading compartment; SDCM, spinning disk confocal microscopy; EE, early endosome; LE, late endosome; RE, recycling endosome; CatS, cathepsin S

## Abstract

In order to mount high-affinity antibody responses, B cells internalise specific antigens and process them into peptides loaded onto MHCII for presentation to T<sub>H</sub> cells. While the biochemical principles of antigen processing and MHCII loading have been well dissected, how the endosomal vesicle system is wired to enable these specific functions remains much less studied. Here, we

performed a systematic microscopy-based analysis of antigen trafficking in B cells to reveal its route to the MHCII peptide-loading compartment (MIIC). Surprisingly, we detected fast targeting of internalised antigen into peripheral acidic compartments that possessed the hallmarks of MIIC and also showed degradative capacity. In these vesicles, internalised antigen converged rapidly with membrane-derived MHCII and partially overlapped with Cathepsin-S and H2-M, both required for peptide loading. These early compartments appeared heterogenous and atypical as they contained a mixture of both early and late markers, indicating specialized endosomal route. Together, our data suggests that, in addition to previously-reported perinuclear late endosomal MIICs, antigen processing and peptide loading could start already in these specialized early peripheral acidic vesicles to support fast peptide-MHCII presentation.

## Introduction

B lymphocytes (B cells) are an essential part of the adaptive immune system, initiating antibody responses against a vast repertoire of different antigens. Critical for the ability of B cells to mount a mature antibody response including class-switch recombination and affinity maturation, is the presentation of specific antigen-derived peptides loaded onto the major histocompatibility complex (MHC) class II (MHCII). Presentation of peptide-MHCII (pMHCII) complex on the B cell surface enables them to act as antigen-presenting cells (APCs) to CD4<sup>+</sup> T lymphocytes (T helper cells, T<sub>H</sub> cells). T cell receptor (TCR)-pMHCII interaction provides a second activation signal to the B cells. Reciprocally, pMHCII presented on B cells stimulates cognate T<sub>H</sub> cells to orchestrate other branches of the immune system and to generate CD4<sup>+</sup> T cell memory (Whitmire et al., 2009).

Presentation of different antigenic peptides on MHCII is a critical driver of various adaptive immune responses. Other professional APCs, such as dendritic cells and macrophages, present peptides from unspecified antigens taken up by phagocytosis or via receptor-mediated uptake of innate type of immune receptors, like complement receptors or Fc-receptors. B cells, however, ensure efficient presentation of antigens of given specificity, determined by the B cell antigen receptor (BCR) (Aluvihare et al., 1997; Unanue et al., 2016). Studies on pMHCII loading have largely focused on dendritic cells and macrophages, leaving B cell antigen processing and presentation less understood.

The MHCII peptide-loading compartment (MIIC), where antigen is processed into peptides for loading onto MHCII molecules, contains in addition to its main hallmarks, antigen and MHCII, the key peptide loading chaperone H2-M and the proteolytic enzyme Cathepsin-S (Adler et al., 2017). MIIC has been well characterized by various biochemical fractionation techniques. However, in these assays the information about the heterogeneity, localization and dynamics of the vesicles is typically lost. Therefore, important questions remain about the coordination of antigen processing and MHCII loading and presentation. How is the endosomal vesicle machinery of B cells tuned to enable this highly specific process and how is the efficient targeting of BCR-derived antigen for processing coordinated? It has been suggested that MIICs are multivesicular and typically contain a late endosomal / lysosomal marker Late Antigen Membrane Protein 1 (LAMP1) (Lankar et al., 2002; Unanue et al., 2016; Adler et al., 2017). Thus, a picture has been outlined where the maturation of MIIC diverts at the stage of multivesicular bodies (MVB) before fusion with end-stage lysosome. However, it is not understood how this process is regulated. To help to decipher the

molecular underpinnings of antigen presentation, deeper knowledge on intracellular trafficking of antigen would be required.

In the last 10-15 years, developments in fluorescence microscopy techniques, including improved fluorophores and fluorescent fusion proteins, as well as more sensitive and higher resolution imaging modalities, have significantly increased our general understanding of intracellular vesicle traffic. Microscopy can provide information about the dynamics and heterogeneity of different vesicle carriers that are otherwise challenging to decipher with other techniques. The classical or ubiquitous endolysosomal pathway is delineated as a route from early endosomes (EE) to late endosomes (LE) / MVB and, lastly, to lysosomes, with early and late recycling endosomes (RE) sending cargo back to the cell surface. While this general view is relatively well established, new studies continue to reveal dramatic complexity within the endolysosomal system with numerous vesicle sub-populations, transport proteins and vesicle markers as well as vesicle scission and fusion machineries (Chen et al., 2019; Delevoeye et al., 2019; Huotari and Helenius, 2011). A group of vital regulators of vesicle traffic are the small GTPases of the Rab protein family that are widely used to define different endolysosomal sub-populations. This family contains more than 60 proteins in humans performing either ubiquitous or specific functions in vesicle traffic (Wardinger-Ness & Zerial, 2014). The appreciation of the role of the Rab proteins has been key in unravelling the endosomal network dynamics. However, different carriers vary not only in terms of their Rab identity markers, but also in size, shape, membrane morphology, subcellular localization and acidity. In addition, identification of different cell-type specific variations of vesicular transport systems and diverse specialized endolysosome-related organelles, where MIIC could be counted in (Delevoeye et al., 2019), pose an ongoing challenge for researchers.

In this work, we set up a systematic microscopy approach to follow how antigen, after BCR-mediated internalisation, traffics into MIIC. In accordance to previous studies, we detected and quantified gradual clustering of antigen vesicles towards perinuclear region in 30-60 min. Right after internalisation, antigen appeared in heterogenous vesicles that harboured mixed selection of both early and late endosomal markers. Interestingly, already these early compartments in the cell periphery accumulated hallmarks of MIIC and were able to gain degradative capacity. By specific visualization of membrane-derived MHCII molecules, we found that in these early antigen compartments, MHCII originated largely from the plasma membrane pool, possibly to support fast, first-wave peptide presentation. This study provides the first in-depth imaging of antigen processing pathway in B cells. We found remarkable efficiency in joint targeting of antigen and membrane-

111 derived MHCII into peripheral compartments with hallmarks of MIIC. The results increase our  
112 understanding of the endolysosomal machinery responsible for MIIC formation and can facilitate  
113 future dissections of the regulation of successful antigen presentation.

## Results

### *Antigen migrates into the perinuclear area in 30-60 min after activation*

To characterize antigen vesicle trafficking in B cells, we first set to analyse the migration and clustering of antigen in a quantitative manner. We used cultured A20 B cells expressing transgenic D1.3 IgM (A20 D1.3) and activated them with Alexa Fluor-labelled anti-IgM antibodies (AF- $\alpha$ IgM) as surrogate antigen. The localization of the antigen vesicles was imaged in cells fixed at different timepoints and stained for pericentriolar material 1 (PCM1) as a marker for microtubule organizing centre (MTOC) by spinning disc confocal microscopy (SDCM). Well consistent with the literature (Aluvihare et al., 1997; Siemasko et al., 1998; Tsui et al., 2018; Vascotto et al., 2007a), we found that, within 30-60 min, most cells gathered antigen in a cluster that typically localized quite centrally in the vicinity of MTOC (Fig. 1A). The same phenomenon was also detected in splenic primary B cells isolated from MD4 mouse strain, selected for their relatively high and homogenous levels of IgM. Primary B cells, however, showed faster kinetics with most cells accumulating antigen in central clusters already in less than 30 min (Fig. 1B). To quantitatively analyse antigen migration, we deconvolved the images to improve the separation of small vesicles and then quantified the total number of vesicles per cell and their mean distance to the MTOC using MatLab-based 3D analysis (Fig. 1C). By showing a reduction of the vesicle numbers over time, the analysis clearly demonstrated the fusion, or clustering, of vesicles into bigger entities. At the same time, the average distance to the MTOC decreased, depicting migration of the vesicles closer to the MTOC over time (Fig. 1D, E). Although the vesicle number diminished between 30 and 45 min, the mean distance of the vesicles to the MTOC remained constant. This suggested that the majority of the antigen was trafficked to the perinuclear region already in 30 min, but vesicle fusion events and/or clustering continued at later timepoints (Fig. 1E). The quantification revealed the overall kinetics of the antigen transition from smaller peripheral vesicles into bigger vesicles or vesicle clusters that accumulate close to the MTOC.

In order to gain insights into the morphological features of the antigen vesicles, we activated the A20 D1.3 cells with a mixture of AF- $\alpha$ IgM and 6 nm-colloidal gold- $\alpha$ IgM and used transmission electron microscopy (TEM) to visualize antigen-containing membrane structures. We found high heterogeneity in the vesicle morphologies both after 15 min of activation and after 75 min of activation when the antigen was largely concentrated in the middle of the cells (Fig. 1F). In the 15 min timepoint, we found antigen in spherical or horse-shoe shaped single membrane vesicles, as

well as in tubular or network-like structures, which often contained intraluminal vesicles (Fig. 1F; Supplementary Fig. 1A). MVBs are typically considered to represent late endosomes, and for MIICs, MVB-like structures have been characterized after 1h of activation in the perinuclear region (Adler et al., 2017; Lankar et al., 2002; Unanue et al., 2016; Vascotto et al., 2007b). While multivesicular morphology has been linked to MHCII loading (Roche and Furuta, 2015; Lith et al., 2001; Xiu et al., 2011), the localization of antigen into multivesicular structures raised the question whether already at 15 min after activation, in the cell periphery, antigen could be in MIIC. At 75 min timepoint, we found antigen predominantly in multivesicular structures accumulated in the perinuclear area. This region was also very dense in various other membrane organelles, such as Golgi and mitochondria. Consistent with the literature (Vascotto et al., 2007a), we also typically found these vesicle-dense areas at sites of nuclear invaginations (Fig. 1F). The possible effect of colloidal gold-conjugation to the localization of anti-IgM was controlled by immunofluorescence analysis of sample duplicates. We detected strong colocalisation of fluorescently labelled anti-IgM and gold-conjugated anti-IgM, distinguished by a specific secondary staining. Both antigens also accumulated together into perinuclear Rab7 compartment at 75 min timepoint similarly to the samples without colloidal gold (Supplementary Fig. S1B; see Fig. 1A and Fig. 2B).

#### ***Antigen colocalisation with early and late endosomal Rab-proteins***

Mechanisms of endosomal trafficking in various cellular systems are largely governed by Rab-family of small GTPases, which are commonly used to define sub-populations of vesicles with different functions. To reveal the endolysosomal character of the vesicles transporting antigen, we designed a series of colocalisation analyses with the following classical endosomal markers: Rab5 for EEs, Rab7 and Rab9 for LEs and lysosomes, and Rab11 for REs. As antigen-bound BCR is known to form clusters at the cell membrane prior to endocytosis, we first examined the proportion of the dot-like antigen features that was internalised at 10-20 min timepoints, and thus would be expected to colocalise with vesicular markers. At these early timepoints most vesicles still remain in the cell periphery and it is not readily apparent if the antigen is internalised or just clustered at the plasma membrane. To distinguish the internalised antigen from the antigen still on the plasma membrane, we stimulated the cells with biotinylated AF- $\alpha$ IgM. After 10-60 min activation, cells were stained on ice with fluorescent streptavidin and fixed (Supplementary Fig. S2A). In this way, we were able to distinguish between total (Alexa Fluor 647) and membrane-exposed (Alexa Fluor 488) antigen. We saw that in 10-20 min, approximately 40-50% of the dotted antigen features in the images represented internalised vesicles, while the rest of the signal originates from antigen that still remains at the cell surface. As expected, at later timepoints (60 min), majority of the antigen

pool was detected inside the cells (Supplementary Fig. S2B, C). This was well consistent with the flow cytometric analysis of antigen internalisation (Supplementary Fig. S2D). Consistently, we also frequently found non-internalised antigen at the plasma membrane in TEM samples after 15 min of activation (Supplementary Fig. S1A).

To study the colocalisation of antigen and different vesicle markers, we performed immunofluorescence analysis with SDCM. We expected to see clearly higher colocalisation of antigen with early endosomal Rab5 in the early timepoints, and with late endosomal markers at later timepoints. To our surprise, we did not detect major differences between the markers. Instead, Rab5, Rab7, Rab9 and Rab11 all showed prominent punctate pattern of vesicles very close to the plasma membrane that partially overlapped with antigen and partially located just underneath the antigen signal (Fig. 2A, C; Supplementary Fig. S3A). As a negative control, we used Golgi-specific transport protein Rab6 and, as expected, it showed no notable colocalisation with antigen. We quantified the colocalisation using Manders' overlap coefficient, split for antigen channel (M2) (Manders et al., 1993), using Huygens software with automated thresholding. M2 measures the portion of antigen that overlaps with the signal from different Rab-proteins. The analysis supported partial colocalisation of antigen with Rab5, Rab7, Rab9 and Rab11, already at early timepoints after activation (Fig. 2C).

At 60 min timepoint, when most of the antigen was clustered in the perinuclear region, we found enhanced colocalisation with late endosomal markers Rab7 and Rab9, as expected (Fig. 2B, Supplementary Fig. S3B). Rab11, involved in slow recycling, also localized to the antigen cluster as well as the early endosomal marker Rab5. The negative control, Rab6, was found in the perinuclear region close to antigen but with very limited overlap in signals. This suggested translocation of the antigen close to the Golgi apparatus, supporting the above observed localization close to the MTOC (Fig. 1). The quantification suggested significant overlap of antigen with all the studied Rab-proteins except Rab6, with an increasing trend over time (Fig. 2C).

Majority of the vesicles were found very close to each other, both at the early and late time points, at the vicinity of the plasma membrane or in the perinuclear region, respectively, leading to overestimation of the signal overlap. In order to improve the resolution of our data and to better separate different vesicles, we employed super-resolution radial fluctuations (SRRF), an imaging method based on post-processing analysis of signal fluctuations (Gustafsson et al., 2016). Here, we analysed samples activated for 10 or 45 min in order to resolve the nature of the antigen vesicles in



the perinuclear region. Super-resolution SRRF images were obtained by taking 20-50 repetitive images of the same field of view with SDCM and post-processing the data using SRRF plugin in ImageJ. In this way, we could improve the separation of the vesicles significantly and now detected more distinct differences in the localization of Rab-proteins with respect to antigen, especially in later timepoints. In 45 min, Rab7 and Rab9 showed clear colocalisation with antigen, as expected for their late endosomal nature, while Rab5 and Rab11 appeared more scattered and only partially colocalised with antigen, often marking vesicles or membrane domains adjacent to it (Fig. 2D). We analysed SRRF images for Manders' overlap coefficient (M2) and detected a marked colocalisation of antigen signal with late endosomal markers Rab7 and Rab9 in 45 min. We also detected overlap with Rab11, and, to some extent, with Rab5. However, in 10 min the analysis showed close to equal colocalisation of Rab5, Rab7 and Rab9, and a modest level of colocalisation with Rab11. Colocalisation of antigen with Rab6 remained low, confirming the specificity of the analysis (Fig. 2E). The presence of Rab11 in the antigen vesicles could suggest fission and recycling, to some extent already at early timepoints but with increasing efficiency towards later timepoints.

### ***Antigen trafficking involves atypical vesicles that share both early and late endosomal character***

To better define antigen transport vesicles, we asked how other typical early and late endosomal markers, Early Endosome Antigen 1 (EEA1) and LAMP1, respectively, correlated with antigen at different timepoints. Consistent with the data on different Rab-proteins, we detected partial colocalisation of antigen with both EEA1 and LAMP1 already at early timepoints (Fig. 3A, Supplementary Fig. S3C). The colocalisation became more prominent as antigen trafficked to the perinuclear region (Fig. 3B, Supplementary Fig. S3D). Manders' overlap coefficient also showed continuous or perhaps even increasing overlap with antigen for both markers (Fig. 3C). However, Pearson's correlation coefficients for EEA1 and LAMP1 crossed over time indicating that significantly higher proportion of LAMP1 compared to EEA1 colocalised with antigen at later timepoints. This is consistent with a high proportion of EEA1 endosomes remaining in the cell periphery, while some coalesce in the central cluster together with antigen, as shown by the M2. On the other hand, increasing proportion of LAMP1-positive vesicles accumulated in the perinuclear region with antigen over time.

As a complementary approach, we again turned to SRRF super-resolution analysis in order to achieve higher accuracy. We examined the colocalisation of antigen with EEA1 and LAMP1 at 10 and 45 min after activation. SRRF analysis confirmed higher colocalisation of antigen with EEA1 compared to LAMP1 in the early timepoints (10 min), and vice versa after 45 min (Fig. 3D-E).

Nevertheless, EEA1 colocalisation with antigen was also detected both in some remaining peripheral vesicles and in the perinuclear antigen vesicle cluster, raising a possibility that also early endosomal EEA1 could indeed localize to the MIIC. Together, this data revealed surprising localization of antigen with not only early, but also late endosomal carriers shortly after internalisation. At later timepoints, close to the MTOC, preference for late endosomal / lysosomal markers was notable, yet also early endosomal markers were found to overlap with antigen.

As previous shown (Supplementary Fig. S2B-C), in 15 min approximately half of the dots with antigen signal should represent vesicles inside the cell, and the rest should originate from antigen-BCR clusters still at the plasma membrane. Therefore, M2 values for one type of vesicle marker should not be considerably higher than 50% in the early timepoints. Our observation that antigen showed an overlap of 40-60% with both early and late endosomal markers can simply reflect technical challenges to resolve small vesicles close to each other, causing adjacent vesicles to appear as colocalised. Additionally, it could point towards mixed vesicle identities that would simultaneously possess both early and late markers. To test for these two non-exclusive scenarios, we next performed SRRF super-resolution analysis on cells activated either for 10 or 45 min and stained for LAMP1 and EEA1, and asked if the markers colocalised in the same antigen vesicles. We found antigen vesicles that colocalised with only either EEA1 or LAMP1, but we also found several prominent vesicles that clearly contained both markers simultaneously (Fig. 3F).

Next, we asked if the vesicles that share both early and late endosomal markers were in the transition state of their maturation or if they represented a special compartment. To investigate this, we performed live imaging of A20 D1.3 B cells transfected with green fluorescent protein (GFP)-fused Rab5 and loaded with LysoTracker, a fluorescent tracer that labels low pH compartments, such as LEs and lysosomes. We followed antigen vesicles at early timepoints after internalisation by SDCM. We detected several antigen vesicles that contained both early endosomal Rab5 and LysoTracker (Fig. 3G; Supplementary Movie 1). The joint movement of the markers implied physical colocalisation, and indicated that antigen, indeed, traffics in atypical vesicles that share both early and late endosomal features. Interestingly, we detected double positive vesicles also before cell activation (Supplementary Fig. 4).

### ***Antigen enters degradative compartments shortly after internalisation***

As the primary purpose of antigen uptake by B cells is to degrade it for loading the resulting peptides onto MHCII complexes, we next asked the question where and when does the antigen

degradation start. We linked a fluorescent probe for proteolysis, DQ-OVA, to  $\alpha$ IgM or specific HEL antigen recognized by the D1.3 BCR (Fig. 4A). Fluorescent DQ moieties quench each other when the probe remains intact. However, upon proteolysis the quenching ceases and the fluorescence can be detected. We first analysed the increase in DQ fluorescence by flow cytometry. Already at 15-20 min we detected a clear signal that constantly increased through the analysis period, 45 min, suggesting that the proteolysis starts relatively fast after antigen uptake (Fig. 4B). We detected brighter DQ-Ova signal at later timepoints when linked to HEL, despite having similar internalisation rate to anti-IgM (see Supplementary Fig. S2D). Due to the brighter signal of DQ-Ova conjugated to HEL, we performed the microscopy analysis using this probe. Fluorescence signal from antigen-linked DQ moieties was also visible by microscopy at 20 min after activation. The DQ-signal overlapped well with EEA1 and was also found to colocalise with CatS, an enzyme essential for preparing the MHCII for peptide loading (Fig. 4C).

To investigate the level of antigen colocalisation with CatS in a more comprehensive way, we performed immunofluorescence analysis in cells activated for 10 or 45 min. Conventional SDCM imaging suggested partial colocalisation of CatS with antigen both at 10 and 45 min timepoints (Fig. 4D, upper panel). In order to resolve the vesicles better, we performed SRRF analysis, and could more unambiguously detect antigen vesicles that clearly contained CatS already 10 min after activation (Fig. 4D, middle panel). Interestingly, the colocalisation level remained roughly similar, although low, in the later timepoints in the perinuclear region (Fig. 4D, bottom panel; Supplementary Fig. 5A).

Proteolytic activity typically requires acidic pH of the vesicles. To examine the pH of the antigen vesicles, we used live imaging with LysoTracker, as its accumulation is based on acidic pH. In line with our data above (Fig. 3G), we found strong colocalisation of antigen with LysoTracker already in the very early timepoints (1-5 min after activation) (Fig. 4E; Supplementary Movie 2). Notably, we also detected antigen fusing with LysoTracker positive vesicles immediately after internalisation, indicating very fast and efficient targeting of antigen to acidic vesicles (Fig. 4F; Supplementary Movie 3). Curiously, LysoTracker positive vesicles appeared to hover beneath the plasma membrane ready to catch the internalised antigen.

#### ***Antigen colocalises with plasma membrane derived MHCII rapidly after internalisation***

The data above suggests that antigen processing could be initiated already in the peripheral antigen vesicles shortly after internalisation. To ask if these early peripheral vesicles might represent MIIC,

we asked whether they also contain MHCII. We activated the cells for 10 or 60 min with fluorescent antigen and performed immunofluorescence staining of total MHCII. As expected, we found MHCII to strongly colocalise with antigen in the perinuclear antigen cluster at 30 min timepoint. Interestingly, after 10 min of activation, we also detected MHCII in various intracellular vesicles including those containing antigen (Supplementary Fig. S5B). Due to the high signal originating from the plasma membrane-resident MHCII and several internal MHCII-positive structures, we decided to analyse the samples with a super-resolution technique structured illumination microscopy (SIM). SIM significantly improved the resolution and clarity of the imaging (x-y-z), and we could detect strong colocalisation of antigen and MHCII in clearly defined vesicles already at 15 min after cell activation (Fig. 5A).

To investigate if the MHCII in the early antigen vesicles was newly synthesized from the trans-Golgi network, or originated from the plasma membrane pool, we prelabelled the surface MHCII prior to cell activation (Fig. 5B). Interestingly, we saw a strong localization of surface-derived MHCII (sMHCII) to early peripheral antigen vesicles (Fig. 5C). We then proceeded to verify the colocalisation by performing live imaging of cells labelled with fluorescent anti-MHCII prior to activation with fluorescent antigen. The movies revealed very high level of sMHCII in the antigen vesicles (Fig. 5D, Supplementary Movie 4). Finally, to further prove that the early peripheral antigen vesicles could function as MIIC, we stained the cells for H2-M, a molecule of MHC family that functions as a key chaperone in peptide loading to MHCII (Mellins and Stern, 2014). Notably, SRRF super-resolution imaging of immunofluorescence samples showed clear colocalisation of antigen vesicles and H2-M already at 15 min after activation further supporting classification of these early peripheral antigen vesicles as MIIC (Fig. 5E; Supplementary Fig. 5C).

## Discussion

BCR-mediated uptake of specific antigens and their processing for pMHCII presentation is crucial for T cell-dependent antibody responses and BCR/antibody affinity maturation in the germinal centres. Different microscopy-based methods have become a critical tool in studying complicated vesicular networks and can now be used to tackle the endolysosomal system governing antigen processing in B cells. Here, we combined systematic colocalisation analysis of antigen with key markers of various endolysosomal compartments and known components of MIIC to gain information on antigen trafficking towards processing compartments. Consistent with previous studies (Aluvihare et al., 1997; Siemasko et al., 1998; Vascotto et al., 2007a), we observed that,

over time, antigen concentrates in the perinuclear region together with late endosomal markers LAMP1, Rab7 and Rab9, in compartments well-fitting to the description of MIIC. However, we also saw fast and highly efficient targeting of antigen into acidic compartments, that also possessed key features of MIIC, already in minutes after internalisation. These vesicles located in the cell periphery, displayed a heterogenous combination of early and late endosomal markers and also exhibited variable ultrastructural morphologies. Interestingly, we show robust recruitment of surface-derived MHCII to these early peripheral MIICs suggesting that they could support fast presentation using MHCII recycled from the plasma membrane. This work provides the first endosomal roadmap of the intracellular trafficking of antigen in B cells and reveals previously unappreciated efficacy in MIIC formation.

Much of our knowledge in B cell antigen processing compartments is derived from biochemical studies, including cell fractionations, radiolabelling of antigen, and electron microscopy (Amigorena et al., 1994; Lankar et al., 2002; West et al., 1994). While already these early studies drew a valid picture of late endosomal or lysosomal, i.e. LAMP1-positive, multivesicular compartment, the approaches were not suitable to address questions about intracellular localization or dynamics of the antigen vesicles. Yet, these features have been strongly linked to distinct functional properties of endolysosomes and they also inform us about the possible molecular machineries regulating the vesicle traffic (Huotari and Helenius 2011; Hutagalung and Novick, 2011). Our microscopic analysis revealed a remarkable heterogeneity in the endolysosomal markers of antigen vesicles (Fig. 1-3). However, overlapping fluorescent signals could be derived from a vesicle containing two markers, two vesicles containing different markers, or a multilobular vesicle with distinct markers in different domains, not resolvable by conventional light microscopy. Therefore, the small size and crowdedness of the vesicles generated challenges for the colocalisation analyses, which we could, at least partially, overcome by the super-resolution SRRF and SIM analyses. While SDCM can achieve a lateral resolution of 250-300 nm, SIM and SRRF improve the x-y resolution by approximately 2-fold. SIM also improves the axial resolution by 2-fold from approximately 600 to 300nm.

The vesicle heterogeneity could be linked to the notion that antigen enters vesicles with low pH (LysoTracker-positive) and degradative capacity (demonstrated by DQ-Ova signal and partial overlap with CatS) extremely fast after internalisation (Fig. 4). It has also been shown that the amounts of Rab-proteins on a given vesicle can fluctuate, increasing the noise in the colocalisation parameters (Huotari and Helenius 2011; Hutagalung and Novick, 2011; Rink et al. 2005;

Vonderheit and Helenius 2005). Notably, we found that antigen also trafficked in atypical vesicles stably marked by both early endosomal Rab5 and LysoTracker indicating that the heterogeneity of the vesicles would be a more constant feature and not a mere transition state. Our data does not clearly fit the classical “Rab conversion” model, where a vesicle rapidly shifts from Rab5-positive into Rab7-positive (Huotari and Helenius, 2011; Hutagalung and Novick, 2011). Instead, the data might better comply with an alternative model, where sequential budding of membrane domains with late endosomal markers would occur from early/sorting endosomes (Huotari and Helenius 2011; Wandinger-Ness and Zerial, 2014) and, indeed, we often detected adjacent localization of different markers possibly indicative of distinct domain on the same vesicle.

Martinez-Martin and colleagues used SIM to demonstrate, in primary B cells, that 15 min after activation, part of the internalised antigen concentrated in ring-like structures representing autophagosomes (Martinez-Martin et al., 2017). However, it remains unclear what could be the role of autophagy in terms of antigen fate or pMHCII processing. In our SIM analysis, we also detected some ring-like structures, that could represent autophagosomes (Fig. 5A) and the partial partitioning of antigen in these autophagosomes could be responsible for some of the vesicle heterogeneity we observed. Our data also does not rule out contribution of other vesicular carriers, like clathrin-independent carriers (CLICs), that do not contain specific markers (Kirkham et al., 2005).

An interesting finding from our live imaging data was that the LysoTracker positive, i.e. low pH vesicles, appeared to hover close to the plasma membrane and capture antigen right after internalisation (Fig. 4F). Some of these LysoTracker-positive vesicles also contained Rab5 already before cell activation (Supplementary Fig. S4). This effectiveness suggests prewiring of the B cells endolysosomal system towards antigen presentation, probably accompanied or boosted by a signalling component from the BCR, as suggested already by Siemasko and colleagues (Siemasko et al., 1998). As such, we support MIIC to be considered as a member of the growing family of specialized endolysosome-related organelles (ELRO) with diverse functions, as proposed in a recent review by Delevoye and colleagues (Delevoye et al., 2019). Considering the poor compliance of antigen vesicles with classical endolysosomal pathway, other ELROs could serve as valuable additional points of comparisons for studies of MIIC membrane traffic. It has been shown that B cells on activatory surfaces mimicking immunological synapses, polarize the MTOC and acidic MHCII vesicles to secrete proteases for antigen extraction (Yuseff et al., 2011). While this happens at later stages of activation and is proposed to precede antigen internalisation, it demonstrates atypical functions of B cell acidic compartments, perhaps analogous to the secretion



of lytic granules, another type of ELRO, by CD8<sup>+</sup> T cells (Delevoye et al., 2019; Yuseff et al., 2013).

To test if antigen trafficking, despite of the observed heterogeneity, would depend on the classical early and late endosomal Rabs, we expressed various dominant negative or constitutively active mutants of Rab 5, 7, 9 and 11, but were not able to detect clear defects in antigen migration patterns (data not shown). This could point towards a hitherto unknown hardwiring in the system making these regulators redundant. Alternatively, the Rab mutants might not function as expected, as soundly demonstrated for the commonly used activating mutations that might not get activated in the first place (Langemeyer et al., 2014). In addition, redundancy is likely between isoforms and paralogs, like Rab5 isoforms a/b/c, or Rab7 and Rab9 which share high sequence homology and are suggested to play mutually redundant roles (Homma et al., 2019). Numerous other Rab-proteins have been shown to possess cell type or cargo-specific functions, linked to different ELROs. It is well possible that other Rab-proteins, not tested in this study, could serve as critical regulators of antigen vesicle trafficking. In dendritic cells, a genome-wide siRNA screen for molecules regulating MHCII distribution, has been performed (Paul et al., 2011). This screen did not highlight any Rab-family proteins, suggesting for considerable redundancy in the pathway.

Early biochemical studies, using lipopolysaccharide-activated B lymphoblasts, have proposed the existence of peptide-loaded MHCII in multiple endolysosomal compartments (Castellino and Germain, 1995) and, using the same B cell line than us, demonstrated that B cells can indeed present antigen already in 20 min after activation (Aluvihare et al., 1997). Furthermore, studies have shown antigen degradation into peptides 20 min after activation (Barroso et al., 2015; Davidson et al., 1990). These studies are consistent with our finding that the internalised antigen vesicles highly efficiently colocalise with MHCII in various compartments, as well as partially overlap with Cathepsin-S and H2-M (Fig. 4-5). The degradative capacity of the early peripheral vesicles (Fig. 4-5) further supports function in antigen processing. Interestingly, we found that the newly internalised antigen robustly co-localized with surface-derived MHCII (Fig. 5), suggesting that the pre-existing pool of MHCII could be used for the first wave of pMHCII presentation. This point has been previously tested using cycloheximide, known to block de novo protein synthesis. There, however, cycloheximide was found to inhibit all presentation and it was interpreted so that B cells could only present peptides on newly synthesized MHCII (Aluvihare et al., 1997). Later, concerns have been raised on the side effects of cycloheximide. These include disturbance of endosomal trafficking, actin cytoskeletal dynamics and cell polarization and motility (Clotworthy

and Traynor, 2006; Darvishi and Woldemichael, 2016; Oksvold et al., 2012). Thus, the old findings with cycloheximide warrant for a revisit with a sensitive pulse assay for antigen presentation together with more specific inhibitors like, for example, the newly developed FLI-06 that targets ER-exit sites and trans-Golgi network (Yonemura et al., 2016). Our suggestion that biosynthetic MHCII probably arrives to MIIC at later stages, is supported by the old metabolic labelling studies, where, again using the same B cell line than in our study, it was shown that the newly synthesized MHCII arrives to MIIC in 30-60 min after cell activation (Amigorena et al., 1994).

The early peripheral MIICs could facilitate the speed of pMHCII presentation but could also tune the peptide repertoire. In cell fractionation studies, an MHC class II-like protein H2-O has been reported to concentrate more with the early endosomal fraction as compared to late endosomal fraction, while the peptide-loading chaperone H2-M shows the opposite trend (Gondré-Lewis et al., 2001). While H2-O has been characterized with an inhibitory effect on H2-M, it has also been shown to modulate the repertoire of peptides presented on MHCII with a mechanism still unclear (Denzin et al., 2005; Karlsson 2005). Different ratios of H2-M and H2-O could thus distinguish the peptides sent out from the early peripheral MIICs from those originating from the late perinuclear MIIC.

Using TEM, we found that the early peripheral antigen vesicles showed highly diverse morphologies (Fig. 1F, left; Supplementary Fig. 1A). We detected various membrane structures harboring intraluminal vesicles, consistent with the reports characterizing MIICs with multivesicular features (Roche and Furuta, 2015; Unanue et al., 2016; van Lith et al., 2001; Xiu et al., 2011). The shapes ranged from spherical to network-like or multilobular structures. However, also antigen-containing single-membrane vesicles with round or horse-shoe shapes were detected. It has been shown in dendritic cells, that intraluminal vesicles are not required for MHCII loading (Bosch et al., 2013). In the other end of the range, also multilamellar MIIC have been reported (Unanue et al., 2016). These notions suggest that MIIC function is not bound to certain vesicle morphology. Based on both the morphological and vesicle marker-based heterogeneity, we propose that early peripheral antigen vesicles are functional MIIC in transit. Antigen-containing vesicles can part off and fuse again or migrate as such to the perinuclear region for gradual maturation, but our data suggests that the vesicles could maintain the MIIC function throughout this pathway.

## Acknowledgements



We are thankful for Laura Grönfors and Mervi Lindman for technical assistance. Microscopy and flow cytometry were performed at the Cell Imaging and Cytometry (CIC) at the Turku Bioscience, Turku, Finland and we thank the personnel, as well as the personnel of Turku Bioimaging, for their generous help and expertise. Biocenter Finland is acknowledged for providing the imaging infrastructures in CIC and in the Institute of Biotechnology, Helsinki. We thank Tampere Imaging Facility for sharing their image analysis resources. Prof. Johanna Ivaska and Dr. Pranshu Sahgal are acknowledged for their help and generosity regarding reagents and protocols, and Prof. Johanna Ivaska and Prof. Ari Helenius for constructive discussions. Juan Palacios-Ortega is acknowledged for help in manuscript formatting.

## **Funding**

This work was supported by the Academy of Finland (grant ID: 25700, 296684 and 307313; to P.K.M.), Sigrid Juselius and Jane and Aatos Erkko foundations (to P.K.M.), Turku doctoral programme in molecular medicine (TuDMM) (to M.V., S.H-P. and L.O.A.), Turku University foundation (to M.V., L.O.A.), and Paulo foundation (to E.K.).

## **Competing interests**

No competing interests declared.

## **Author contributions**

M.V., S.H-P., E.K., E.J., H.V., and P.K.M. conceived and designed the analysis.

M.V., S.H-P., E.K., V.P., P.P., and S.F. collected the data.

M.V., S.H-P., V.S., E.K., A.V.S., E.J., H.V., A.B., and P.K.M. contributed or performed the data analysis. A.B. developed the Matlab script and analysed data.

L.O.A. generated reagents.

M.V., S.H-P., A.V.S., and P.P. visualized the data.

P.K.M. and S.H-P. wrote the paper.

## Materials and Methods

Table 1. Key resources/reagents table

|            | Reagents                                                                      | Source/Brand           | Cat. number                               | Dilution or concentration | Use                            |
|------------|-------------------------------------------------------------------------------|------------------------|-------------------------------------------|---------------------------|--------------------------------|
| Antigens   | Anti-IgM-biotin                                                               | SouthernBiotech        | 1021-08                                   | 10ug/ml                   | Antigen internalisation (FACS) |
|            | 6nm Gold rat anti-mouse IgM                                                   | Jackson ImmunoResearch | 115-195-075                               |                           | EM                             |
|            | Rhodamine Red-X-AffiniPure Donkey anti-mouse IgM                              | JIR                    | 715-295-140                               | 10ug/ml                   | IF/Live imaging                |
|            | Alexa Fluor 647AffiniPure Donkey anti-mouse IgM                               | JIR                    | 715-605-140                               | 10ug/ml                   | IF/Live imaging                |
|            | Alexa Fluor 488 AffiniPure F(ab') <sub>2</sub> Fragment Donkey anti-mouse IgM | JIR                    | 715-546-020                               | 10 µg/ml                  | Live imaging                   |
|            | Donkey anti-mouse IgM AlexaFluor647-biotin                                    | In-house               | 715-605-140 + Thermo 21343                | 10ug/ml                   | IF                             |
|            | HEL-biotin                                                                    | In-house               | Sigma-aldrich # L6876+ Thermo 21338       |                           | For DQ-Ova probe/FACS          |
| Antibodies | Anti-Rab5                                                                     | CST                    | 3547                                      | 1:150                     | IF                             |
|            | Anti-Rab6                                                                     | CST                    | 9625S                                     | 1:200                     | IF                             |
|            | Anti-Rab7                                                                     | Santa Cruz             | Sc-376362                                 | 1:100                     | IF                             |
|            | Anti-Rab9                                                                     | CST                    | 5118                                      | 1:150                     | IF                             |
|            | Anti-Rab11                                                                    | CST                    | 5589                                      | 1:200                     | IF                             |
|            | Anti-EEA1                                                                     | Santa Cruz             | Sc-6415                                   | 1:50                      | IF                             |
|            | Anti-LAMP1                                                                    | DSHB                   | 1D4B                                      | 1:75                      | IF                             |
|            | Anti-CathepsinS                                                               | LSbio                  | B2550                                     | 1:50                      | IF                             |
|            | Anti-CathepsinS                                                               | Santa Cruz             | sc-271619                                 | 1:50                      | IF                             |
|            | Anti-MHCII                                                                    | Santa Cruz             | Sc-59322                                  | 1:50                      | IF                             |
|            | Anti-MHCII-AF488                                                              | In-house               | Sc-59322 + Thermo A20000                  | 1:50                      | IF/Live imaging                |
|            | Anti-PCM1-AF647                                                               | Santa Cruz             | Sc-398365 AF647                           | 1:200                     | IF                             |
|            | Donkey-anti-rabbit IgG (H+L) AlexaFluor 488/555/647                           | Thermo                 | A21206, A31572, A31573                    | 1:500                     | IF                             |
|            | Donkey anti-goat IgG (H+L) AlexaFluor 488/555                                 | Thermo                 | A11055, A21432                            | 1:500                     | IF                             |
|            | Mouse anti-rat IgG Fcy Fragment Specific AlexaFluor 488/RRx/647               | JIR                    | 212-545-104<br>212-295-104<br>212-605-104 | 1:500                     | IF                             |
|            | Goat-anti-mouse IgG Fcy subclass 1 AlexaFluor 488/RRx/647                     | JIR                    | 115-545-205<br>115-295-205<br>115-605-205 | 1:500                     | IF                             |

|       |                      |          |                                                                                |         |              |
|-------|----------------------|----------|--------------------------------------------------------------------------------|---------|--------------|
| Other | LysoTracker Deep Red | Thermo   | L12492                                                                         | 125 nM  | Live imaging |
|       | DQ-OVA-biotin        | In-house | Thermo D12053<br>+EZ-Link<br>Maleimide-PEG2-<br>biotin<br>(Thermo<br>21901BID) | 1:10    | FACS         |
|       | Fibronectin          | Sigma    | F4759-2MG                                                                      | 4 µg/ml | IF           |

# *Cells and mice*

A20 mouse lymphoma cells stably expressing a hen egg lysozyme (HEL)–specific IgM BCR (D1.3) (Williams et al, 1994) were maintained in complete RPMI (cRPMI; RPMI 1640 with 2.05 mM L-glutamine supplemented with 10% fetal calf serum (FCS), 50 µM β-mercaptoethanol, 4 mM L-glutamine, 10 mM HEPES and 100 U/ml Penicillin/Streptomycin). Primary splenic B cells were isolated from MD4 mice (C57BL/6-Tg(IghelMD4)4Cc/J, The Jackson Laboratory) using a negative selection kit (StemCell Technologies, # 19854).

# *Transfection*

A20 D1.3 cells were transfected as previously described (Sustar et al., 2018). Briefly, 2 million cells were resuspended in 180ul of 2S transfection buffer (5 mM KCl, 15 mM MgCl<sub>2</sub>, 15 mM HEPES, 50 mM Sodium Succinate, 180 mM Na<sub>2</sub>HPO<sub>4</sub>/ NaH<sub>2</sub>PO<sub>4</sub> pH 7.2) containing 2 µg of plasmid and electroporated using AMAXA electroporation machine (program X-005, Biosystem) in 0.2 cm gap electroporation cuvettes. Cells were then transferred to 2ml of cRPMI to recover overnight. Rab5a-GFP plasmid was a kind gift from Prof. Johanna Ivaska.

# *B cell activation and visualization of antigen vesicles by immunofluorescence*

A20 D1.3 or isolated primary B cells were activated with 10µg/ml of Alexa Fluor-647 or Rhodamine Red-X (RRx) anti-mouse IgM (α-IgM) (Jackson ImmunoResearch), unless indicated otherwise. Cells were labelled with fluorescently-labelled α -IgM for 10 min on ice, washed with PBS to remove excess unbound antigen and resuspend in Imaging Buffer (PBS, 10% FCS). When indicated, cells were also labelled with anti-MHCII-Alexa Fluor 488 on ice. After washing, cells were activated for different timepoints in an incubator (5% CO<sub>2</sub>, 37°C) in a 12-wells PTFE diagnostic slide (Thermo, #10028210), coated with fibronectin, and fixed with 4% PFA 10min at RT. Samples were blocked and permeabilized with blocking buffer (5% horse or donkey serum, 0.3% Triton X100 in PBS) for 20min at RT. After blocking, samples were stained with primary antibodies for 1h at RT or 4°C O/N in staining buffer (1% BSA, 0.3% Triton X100 in PBS),

followed by washes with PBS and incubation with the secondary antibodies 30min at RT in PBS. Samples were mounted using FluoroMount-G containing DAPI (Thermo #00495952).

### *Visualization of antigen vesicles by live imaging*

A20 D1.3 cells (1 million/ml) were labelled with 125 nM LysoTracker Deep Red (Thermo # L12492) for 1 hour in an incubator (5% CO<sub>2</sub>, 37°C), washed with PBS and resuspended in cRPMI. Cells were then labelled with 10µg/ml of donkey anti-mouse IgM-AF488 on ice for 10 min and washed with cold PBS. For surface-MHCII internalisation experiments, cells were stained on ice with anti-MHCII-AF488 and 10µl/ml donkey-anti-mouse IgM-RRx for 5min and washed with cold PBS. Cells were resuspended in cold Imaging Buffer and seeded on 4-well MatTek dishes on ice. After seeding, cells were activated at 37 °C inside the environmental chamber of the microscope and image immediately.

### *Image acquisition and processing, spinning disk confocal microscopy*

Images were acquired using a 3i CSU-W1 spinning disk equipped with 405, 488, 561 and 640 nm laser lines and 510-540, 580-654 and 672-712 nm filters and 63x Zeiss Plan-Apochromat objective. Hamamatsu sCMOS Orca Flash4 v2 C11440-22CU (2048 x 2048 pixels, 1x1 binning) was used to image fixed samples unless otherwise indicated, and Photometrics Evolve 10 MHz Back Illuminated EMCCD (512 x 512 pixels, 1x1 binning) camera was used to image live samples. All SDCM images were deconvolved with Huygens Essential version 16.10 (Scientific Volume Imaging, The Netherlands, <http://svi.nl>), using the CMLE algorithm, with Signal to Noise Ratio of 20 and 40 iterations. For SRRF, 20-50 images were acquired from one single plane using timelapse mode and processed in Fiji ImageJ using the SRRF module.

### *Colocalisation analysis*

Colocalisation on Spinning Disk Confocal Microscope images were analysed with Huygens Essential version 16.10 (Scientific Volume Imaging, The Netherlands, <http://svi.nl>), using optimized, automatic thresholding. Colocalisation on SRRF images was performed on ImageJ using Colocalisation Threshold tool. Graphs and statistics were prepared on GraphPad Prism (GraphPad Software, La Jolla California USA).

### *Analysis of antigen clustering*

Cluster analysis of the deconvolved data was done by batch processing in Matlab R2017a (The MathWorks Inc.). Binary masks were created from full volumes containing one cell using the

method by Otsu. Objects were then segmented in 3D using the regionprops function. Only objects inside a circular mask were kept in order to exclude clusters from adjacent cells, for simplicity this was done in 2D by manually overlaying the image with a circle. The MTOC channel was segmented in the same way and the cluster with the highest intensity value was identified as MTOC. The distances of each cluster to the MTOC was calculated from the centroid positions in 3D. Graphs and statistics were prepared on GraphPad Prism.

### *Structured illumination microscopy (SIM)*

The samples were prepared as above in “*B cell activation and visualization of antigen vesicles by immunofluorescence*” on fibronectin-coated MatTek dishes and mounted in Vectashield (Vector Laboratories, US) mounting medium. 3D structured illumination (SIM) Imaging was performed with GE Healthcare, DeltaVision OMX SR V4 with 60x/1.42 SIM Olympus Plan Apo N objective, front Illuminated sCMOS cameras, 488, 568 and 640 nm solid-state lasers by optical sectioning of 0.125  $\mu\text{m}$ . The SIM reconstruction was performed with OMX Acquisition software version 3.70. (GE Healthcare, UK).

### *Antigen internalisation for flow cytometry*

A20 D1.3 cells were stained on ice for 10 min with anti-IgM-biotin (Southern Biotech) or HEL-biotin and washed with PBS. Cells were incubated at 37°C and 5% CO<sub>2</sub> at different timepoints. For time 0 the samples were kept on ice all the time After incubation, cells were kept on ice and stained with streptavidin-633 (Life Technologies #S-21375) for 20min, washed and analysed. BD LSR Fortessa analyser equipped with four lasers (405, 488, 561 and 640nm) was used.

### *Antigen internalisation, immunofluorescence*

A20 D1.3 cells were stained on ice for 10 min with biotinylated anti-IgM-Alexa Fluor F647- (labelled in-house) and washed with PBS. Cells were resuspended in Imaging Buffer (PBS, 10% FCS) and activated for different timepoints in an incubator (5% CO<sub>2</sub>, 37°C) on fibronectin-coated 12-well microscope slide. After activation, slides were kept on ice to stop internalisation and stained with streptavidin-Alexa Fluor 488 (#S11223) for 10 min. Cells were washed with PBS and fixed with 4% PFA 10 min at RT. Samples were mounted using FluoroMount-G (Thermo 00-4958-02).

### *DQ-Ova proteolysis reporter*

DQ Ovalbumin (Thermo Fisher Scientific D12053) was biotinylated in-house with EZ-Link Maleimide-PEG2-biotin (Thermo 21901BID). HEL from (#L6876 Sigma) was biotinylated using EZ-Link™ Sulfo-NHS-LC-LC-Biotin (Thermo 21338). A20 D1.3 cells were first incubated with biotin-HEL or biotinylated anti-IgM (Southern Biotech) for 10 min on ice. After washing with PBS, cells were incubated for 5min on ice with unlabelled streptavidin for IF samples or Alexa Fluor 633-labelled streptavidin for flow cytometry samples, wash with PBS, and incubated 5min on ice with biotinylated-DQ-Ova. After 3 washes with PBS, cells were activated in an incubator (5% CO<sub>2</sub>, 37°C) to allow internalisation of the probe-linked antigen. After the activation, cells were placed on ice and analysed by flow cytometry immediately. For immunofluorescence samples, cells were activated on 12-well slides coated with fibronectin in the incubator, fixed with 4% PFA after activation, and stained as previously described. DQ-Ova was excited with 488 nm laser and measured with filters identical to Alexa Fluor 488 or GFP.

### *Transmission electron microscopy*

A20 D1.3 cells were activated with a mixture of 6 nm colloidal-gold conjugated goat anti-Mouse IgM (Jackson ImmunoResearch, 115-195-075; 1:650 dilution) and 20 µg/ml Alexa Fluor 647 labelled donkey anti-mouse IgM F(ab')<sub>2</sub> fragments (Jackson ImmunoResearch, 715-606-020) in imaging buffer (0.5mM CaCl<sub>2</sub>, 0.2mM MgCl<sub>2</sub>, 5.5mM D-Glucose, 10% FBS in PBS) and placed on fibronectin (4 µg/ml) coated glass coverslips (thickness #1) for 15 or 75 min. The cells were fixed with 2 % Glutaraldehyde (EM-grade, Sigma G7651) in 0.1 M Na-Cacodylate buffer, pH 7.4, for 30 min at room temperature, and then washed twice for 3 min with 0.1 M Na-Cacodylate buffer, pH 7.4. The samples were processed for TEM as described in Seemann et al., 2000. 60-nm-thick sections parallel to the cover slip were cut using a Leica EM Ultracut UC7 ultramicrotome (Leica Mikrosysteme GmbH, Austria). The electron micrographs post-stained with uranyl acetate and lead citrate, and imaged with Jeol JEM 1400 transmission electron microscope (Jeol Ltd., Tokyo, Japan) equipped with a bottom mounted CCD-camera (Orius SC 1000B, Gatan Inc., Pleasanton, CA) and Jeol JEM-1400 Plus equipped with OSIS Quemesa bottom-mounted CCD-Camera (EMSIS, Germany), both operating at 80 kV.

### *Statistical analysis*

Statistical significances were calculated using unpaired Student's *t*-test or two-way Anova. Statistical values are denoted as: \**P*<0.05, \*\**P*<0.01, \*\*\**P*<0.001, \*\*\*\**P*<0.0001.

### **References**



657

658 **Adler, L. N., Jiang, W., Bhamidipati, K., Millican, M., Macaubas, C., Hung, S. chen and Mellins, E. D.** (2017). The other  
659 function: Class II-restricted antigen presentation by B cells. *Front. Immunol.*

660 **Aluvihare, V. R., Khamlichi, A. A., Williams, G. T., Adorini, L. and Neuberger, M. S.** (1997). Acceleration of intracellular  
661 targeting of antigen by the B-cell antigen receptor: importance depends on the nature of the antigen-antibody interaction.  
662 *EMBO J.* **16**, 3553–62.

663 **Amigorena, S., Drake, J. R., Webster, P. and Mellman, I.** (1994). Transient accumulation of new class II MHC molecules in a  
664 novel endocytic compartment in B lymphocytes. *Nature* **369**, 113–20.

665 **Barroso, M., Tucker, H., Drake, L., Nichol, K. and Drake, J. R.** (2015). Antigen-B Cell Receptor Complexes Associate with  
666 Intracellular major histocompatibility complex (MHC) Class II Molecules. *J. Biol. Chem.* **290**, 27101–12.

667 **Bosch, B., Heipertz, E. L., Drake, J. R. and Roche, P. A.** (2013). Major histocompatibility complex (MHC) class II-peptide  
668 complexes arrive at the plasma membrane in cholesterol-rich microclusters. *J. Biol. Chem.*

669 **Castellino, F. and Germain, R. N.** (1995). Extensive trafficking of MHC class II-invariant chain complexes in the endocytic  
670 pathway and appearance of peptide-loaded class II in multiple compartments. *Immunity* **2**, 73–88.

671 **Chen, K., Healy, M. D. and Collins, B. M.** (2019). Towards a molecular understanding of endosomal trafficking by Retromer and  
672 Retriever. *Traffic*.

673 **Clotworthy, M. and Traynor, D.** (2006). On the effects of cycloheximide on cell motility and polarisation in Dictyostelium  
674 discoideum. *BMC Cell Biol.* **7**, 5.

675 **Darvishi, E. and Woldemichael, G. M.** (2016). Cycloheximide Inhibits Actin Cytoskeletal Dynamics by Suppressing Signaling via  
676 RhoA. *J. Cell. Biochem.*

677 **Davidson, H. W., West, M. A. and Watts, C.** (1990). Endocytosis, intracellular trafficking, and processing of membrane IgG and  
678 monovalent antigen/membrane IgG complexes in B lymphocytes. *J. Immunol.* **144**, 4101–9.

679 **Delevoeye, C., Marks, M. S. and Raposo, G.** (2019). Lysosome-related organelles as functional adaptations of the endolysosomal  
680 system. *Curr. Opin. Cell Biol.* **59**, 147–158.

681 **Denzin, L. K., Fallas, J. L., Prendes, M. and Yi, W.** (2005). Right place, right time, right peptide: DO keeps DM focused.  
682 *Immunol. Rev.*

683 **Gondré-Lewis, T. a, Moquin, a E. and Drake, J. R.** (2001). Prolonged antigen persistence within nonterminal late endocytic  
684 compartments of antigen-specific B lymphocytes. *J. Immunol.* **166**, 6657–64.

685 **Gustafsson, N., Culley, S., Ashdown, G., Owen, D. M., Pereira, P. M. and Henriques, R.** (2016). Fast live-cell conventional  
686 fluorophore nanoscopy with ImageJ through super-resolution radial fluctuations. *Nat. Commun.*

687 **Homma, Y., Kinoshita, R., Kuchitsu, Y., Wawro, P. S., Marubashi, S., Oguchi, M. E., Ishida, M., Fujita, N. and Fukuda, M.**  
688 (2019). Comprehensive knockout analysis of the Rab family GTPases in epithelial cells. *J. Cell Biol.*

689 **Huotari, J. and Helenius, A.** (2011). Endosome maturation. *EMBO J.* **30**, 3481–500.

690 **Hutagalung, A. H. and Novick, P. J.** (2011). Role of Rab GTPases in membrane traffic and cell physiology. *Physiol. Rev.* **91**, 119–  
691 49.

692 **Karlsson, L.** (2005). DM and DO shape the repertoire of peptide-MHC-class-II complexes. *Curr. Opin. Immunol.*

693 **Kirkham, M., Fujita, A., Chadda, R., Nixon, S. J., Kurzchalia, T. V., Sharma, D. K., Pagano, R. E., Hancock, J. F., Mayor, S.  
694 and Parton, R. G.** (2005). Ultrastructural identification of uncoated caveolin-independent early endocytic vehicles. *J. Cell*  
695 *Biol.* **168**, 465–476.

696 **Langemeyer, L., Bastos, R. N., Cai, Y., Itzen, A., Reinisch, K. M. and Barr, F. A.** (2014). Diversity and plasticity in Rab GTPase  
697 nucleotide release mechanism has consequences for Rab activation and inactivation. *Elife*.

698 **Lankar, D., Vincent-Schneider, H., Briken, V., Yokozeki, T., Raposo, G. and Bonnerot, C.** (2002). Dynamics of major  
699 histocompatibility complex class II compartments during B cell receptor-mediated cell activation. *J. Exp. Med.* **195**, 461–72.

700 **Manders, E. M.M. Verbeek, F. J. Aten, J. A.** (1993). Measurement of co-localization of objects in dual-colour confocal images. *J.*

*Microsc.* **169**, 375–382.

Martinez-Martin, N., Maldonado, P., Gasparri, F., Frederico, B., Aggarwal, S., Gaya, M., Tsui, C., Burbage, M., Keppler, S. J., Montaner, B., et al. (2017). A switch from canonical to noncanonical autophagy shapes B cell responses. *Science* **355**, 641–647.

Mellins, E. D. and Stern, L. J. (2014). HLA-DM and HLA-DO, key regulators of MHC-II processing and presentation. *Curr. Opin. Immunol.* **26**, 115–22.

Oksvold, M. P., Pedersen, N. M., Forfang, L. and Smeland, E. B. (2012). Effect of cycloheximide on epidermal growth factor receptor trafficking and signaling. *FEBS Lett.*

Paul, P., van den Hoorn, T., Jongsma, M. L. M., Bakker, M. J., Hengeveld, R., Janssen, L., Cresswell, P., Egan, D. a, van Ham, M., Ten Brinke, A., et al. (2011). A Genome-wide multidimensional RNAi screen reveals pathways controlling MHC class II antigen presentation. *Cell* **145**, 268–83.

Rink, J., Ghigo, E., Kalaidzidis, Y. and Zerial, M. (2005). Rab conversion as a mechanism of progression from early to late endosomes. *Cell* **122**, 735–49.

Roche, P. A. and Furuta, K. (2015). The ins and outs of MHC class II-mediated antigen processing and presentation. *Nat. Rev. Immunol.* **15**, 203–16.

Seemann, J., Jokitalo, E. J. and Warren, G. (2000). The Role of the Tethering Proteins p115 and GM130 in Transport through the Golgi Apparatus In Vivo. *Mol. Biol. Cell.*

Siemasko, K., Eisfelder, B. J., Williamson, E., Kabak, S. and Clark, M. R. (1998). Cutting edge: signals from the B lymphocyte antigen receptor regulate MHC class II containing late endosomes. *J. Immunol.* **160**, 5203–8.

Sustar, V., Vainio, M., & Mattila, P. K. Visualization and Quantitative Analysis of the Actin Cytoskeleton Upon B Cell Activation. *B Cell Receptor Signaling*, 243.

Tsui, C., Martinez-Martin, N., Gaya, M., Maldonado, P., Llorian, M., Legrave, N. M., Rossi, M., MacRae, J. I., Cameron, A. J., Parker, P. J., et al. (2018). Protein Kinase C- $\beta$  Dictates B Cell Fate by Regulating Mitochondrial Remodeling, Metabolic Reprogramming, and Heme Biosynthesis. *Immunity* **48**, 1144-1159.e5.

Unanue, E. R., Turk, V. and Neefjes, J. (2016). Variations in MHC Class II Antigen Processing and Presentation in Health and Disease. *Annu. Rev. Immunol.*

van Lith, M., van Ham, M., Griekspoor, A., Tjin, E., Verwoerd, D., Calafat, J., Janssen, H., Reits, E., Pastoors, L. and Neefjes, J. (2001). Regulation of MHC Class II Antigen Presentation by Sorting of Recycling HLA-DM/DO and Class II within the Multivesicular Body. *J. Immunol.* **167**, 884–892.

Vascotto, F., Lankar, D., Faure-André, G., Vargas, P., Diaz, J., Le Roux, D., Yuseff, M.-I., Sibarita, J.-B., Boes, M., Raposo, G., et al. (2007a). The actin-based motor protein myosin II regulates MHC class II trafficking and BCR-driven antigen presentation. *J. Cell Biol.* **176**, 1007–1019.

Vascotto, F., Le Roux, D., Lankar, D., Faure-André, G., Vargas, P., Guernonprez, P. and Lennon-Duménil, A.-M. (2007b). Antigen presentation by B lymphocytes: how receptor signaling directs membrane trafficking. *Curr. Opin. Immunol.* **19**, 93–8.

Vonderheit, A. and Helenius, A. (2005). Rab7 associates with early endosomes to mediate sorting and transport of Semliki forest virus to late endosomes. *PLoS Biol.*

Wandinger-Ness, A. and Zerial, M. (2014). Rab proteins and the compartmentalization of the endosomal system. *Cold Spring Harb. Perspect. Biol.* **6**, a022616.

West, M. A., Lucocq, J. M. and Watts, C. (1994). Antigen processing and class II MHC peptide-loading compartments in human B-lymphoblastoid cells. *Nature* **369**, 147–51.

Whitmire, J. K., Asano, M. S., Kaech, S. M., Sarkar, S., Hannum, L. G., Shlomchik, M. J. and Ahmed, R. (2009). Requirement of B Cells for Generating CD4+ T Cell Memory. *J. Immunol.*

Xiu, F., Côté, M.-H., Bourgeois-Daigneault, M.-C., Brunet, A., Gauvreau, M.-É., Shaw, A. and Thibodeau, J. (2011). Cutting edge: HLA-DO impairs the incorporation of HLA-DM into exosomes. *J. Immunol.* **187**, 1547–51.

Yonemura, Y., Li, X., Müller, K., Krämer, A., Atigbire, P., Mentrup, T., Feuerhake, T., Kroll, T., Shomron, O., Nohl, R., et



al. (2016). Inhibition of cargo export at ER exit sites and the trans-Golgi network by the secretion inhibitor FLI-06. *J. Cell Sci.*  
Yuseff, M.-I., Reversat, A., Lankar, D., Diaz, J., Fanget, I., Pierobon, P., Randrian, V., Larochette, N., Vascotto, F.,  
Desdouets, C., et al. (2011). Polarized secretion of lysosomes at the B cell synapse couples antigen extraction to processing  
and presentation. *Immunity* **35**, 361–74.

# Figure 1

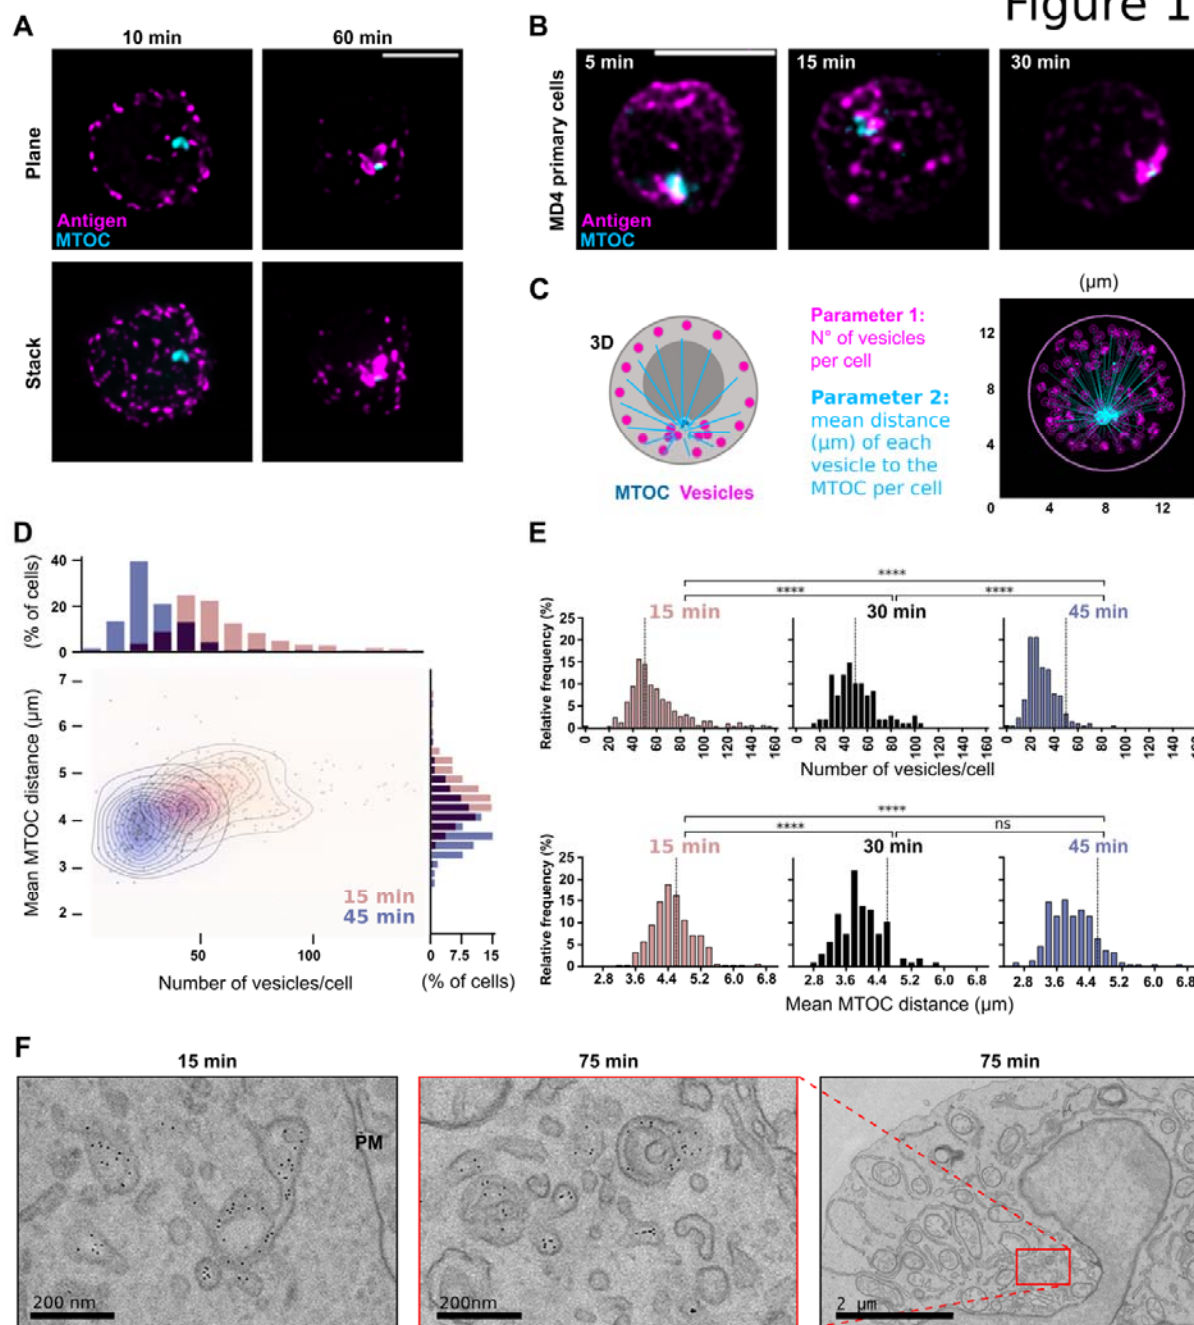

**Figure 1. Antigen vesicles traffic to a perinuclear compartment in the vicinity of the MTOC.** **A** A20 D1.3 B cells were activated with Alexa Fluor-labelled anti-IgM antibodies (AF- $\alpha$ IgM) (antigen, magenta) for 10 and 60 min and stained with antibodies against PCM-1 (MTOC, cyan). 3D SDCM was performed and the images were deconvolved using Huygens software. Upper panel shows single confocal planes and the lower panel shows z-projections of the whole stacks of representative cells. Scale bar 5  $\mu\text{m}$ . **B** Primary MD4 B cells were activated with AF- $\alpha$ IgM (antigen, magenta) for different timepoints and stained with antibodies against PCM-1 (MTOC, cyan). 3D SDCM was performed and the images were deconvolved using Huygens software. Z-projections of the whole stacks from representative cells are shown. Scale bar 5  $\mu\text{m}$ . **C** A schematic of the vesicle quantification using a MatLab-based script. Number of antigen vesicles in one cell (in magenta) and mean distance from all the vesicles to the MTOC (in cyan) is measured in a 3D image. Left, schematic representation; right, example image from the script. **D** Quantification of data in A. 3D images from cells activated for 15 (pink) and 45 (blue) min were analysed as in C. Upper axis shows mean number of vesicles per cell and right axis shows mean distance of the vesicles to MTOC per cell. The two timepoints were compared using a density plot. **E** Comparison of samples prepared as in A, activated for 15, 30 and 45 min and analysed as in C and D. Dashed line represent the median of the cell population in 15 min. Statistical analysis was done using Student's t-test. Timepoints 15 and 45 min contain 2 experiments,  $n > 200$  cells; and timepoint of 30 min is derived from one experiment,  $n > 100$  cells. **F** A20 D1.3 cells were activated with  $\alpha$ IgM conjugated with 6nm colloidal gold particles mixed with AF647- $\alpha$ IgM, for 15 and 75 min and imaged using Transmission Electron Microscopy. PM – Plasma membrane. Scale bars 200 nm and 2  $\mu\text{m}$ .

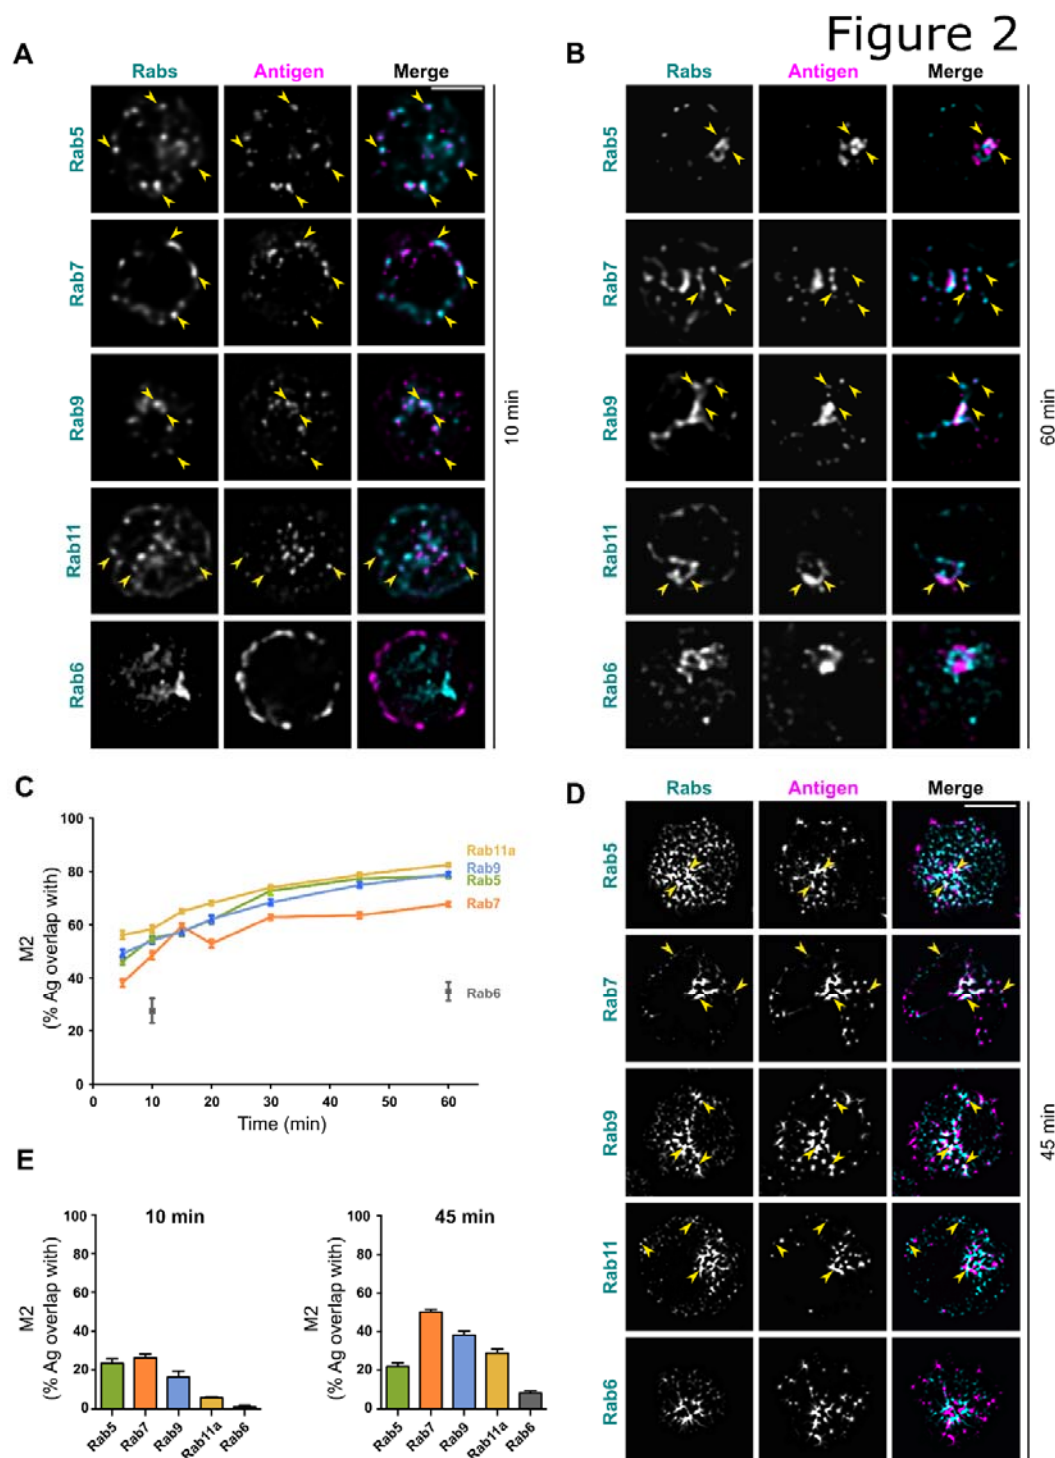

**Figure 2. Colocalisation analysis of antigen with different Rab-proteins.** A-B SDCM imaging of A20 D1.3 cells activated with AF647- $\alpha$ IgM (antigen, magenta) for 10 min (A) or 60 min (B) and immunostained for different Rab-proteins: Rab5, Rab7, Rab9, Rab11 and Rab6 (cyan). Images were deconvolved with Huygens software. Single confocal planes from representative cells are shown and examples of colocalising vesicles are pointed to with yellow arrow-heads. See Supplementary Figure 3A-B for z-projections. Scale bar 5  $\mu$ m. C Quantification of the data in A and B with additional timepoints. Antigen colocalisation with different Rab-proteins was measured from deconvolved images by analysing Manders' overlap coefficients using Huygens. Data from three independent experiments (>80 cells/timepoint). Results are shown as mean  $\pm$ SEM. D Samples were prepared with cells activated for 10 or 45 min as in A-B and imaged with iterative imaging of a single plane with SDCM (20-25 frames/plane) and post-processed to obtain SRRF super-resolution image (antigen, magenta; Rabs, cyan). Examples of colocalising vesicles are pointed to with yellow arrowheads. Scale bar 5  $\mu$ m. E Quantification of the SRRF data in D by analysing Manders' overlap coefficients with ImageJ. Data in 45 min timepoint is from two independent experiments and 10 min from one experiment (>25 cells / timepoint). Results are shown as mean  $\pm$ SEM.

## Figure 3

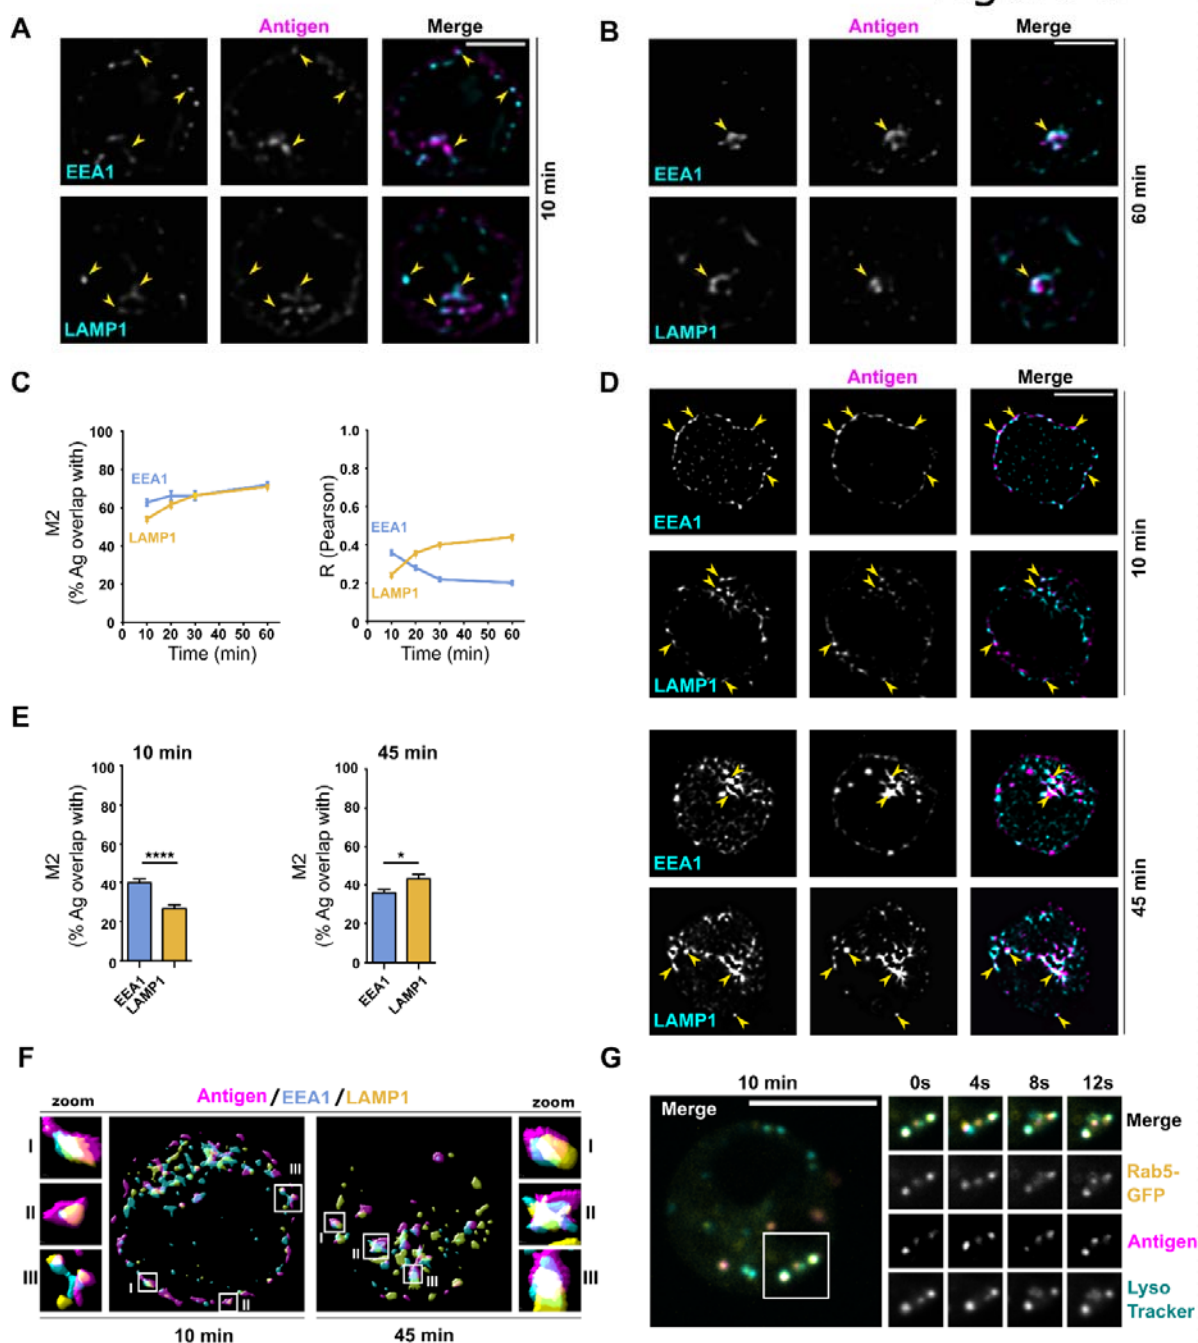

**Figure 3. Antigen localises with both EEA1 and LAMP1 while trafficking to the perinuclear region.** A-B SDCM imaging of A20 D1.3 cells activated with AF647- $\alpha$ IgM (antigen, magenta) for 10 min (A) or 60 min (B) and immunostained for EEA1 or LAMP1 (cyan). Images were deconvolved with Huygens software. Single confocal planes from representative cells are shown and examples of localising vesicles are pointed to with yellow arrow-heads. See Supplementary Figure 3C-D for z-projections. Scale bar 5  $\mu$ m. C Quantification of the data in A and B with additional timepoints. Antigen colocalisation with EEA1 and LAMP1 was measured from deconvolved images by analysing Manders' overlap coefficients and Pearson's correlation coefficients using Huygens. Data from two independent experiments with >40 cells / timepoint. Results are shown as mean  $\pm$  SEM. D Samples were prepared with cells activated for 10 or 45 min as in A-B and imaged with iterative imaging of a single plane with SDCM (20-25 frames/plane) and post-processed to obtain SRRF super-resolution image (antigen, magenta; EEA/LAMP1, cyan). Examples of localising vesicles are pointed to with yellow arrowheads. Scale bar 5  $\mu$ m. E Quantification of the SRRF data in D by analysing Manders' overlap coefficients with ImageJ. Data from three independent experiments (>30 cells/timepoint). Results are shown as mean  $\pm$  SEM. F Surface reconstruction using Huygens rendering tool of SRRF images from samples prepared as in D (antigen, magenta) and immunostained for EEA1 (cyan) and LAMP1 (yellow). Three selected example vesicles are highlighted by zoom-in. G A20 D1.3 cells were transfected with GFP-Rab5 (yellow), loaded with LysoTracker (LT; cyan) and activated with RRx- $\alpha$ IgM (antigen, magenta). Live-imaging was performed with SDCM (ORCA camera) on a single plane. On the left, a merge image of a representative cell after 10 min of activation is shown. On the right, the region in the white square is followed in split channels as a timelapse for 12 sec, starting 10 min after activation. See supplementary Movie 1.



Figure 4

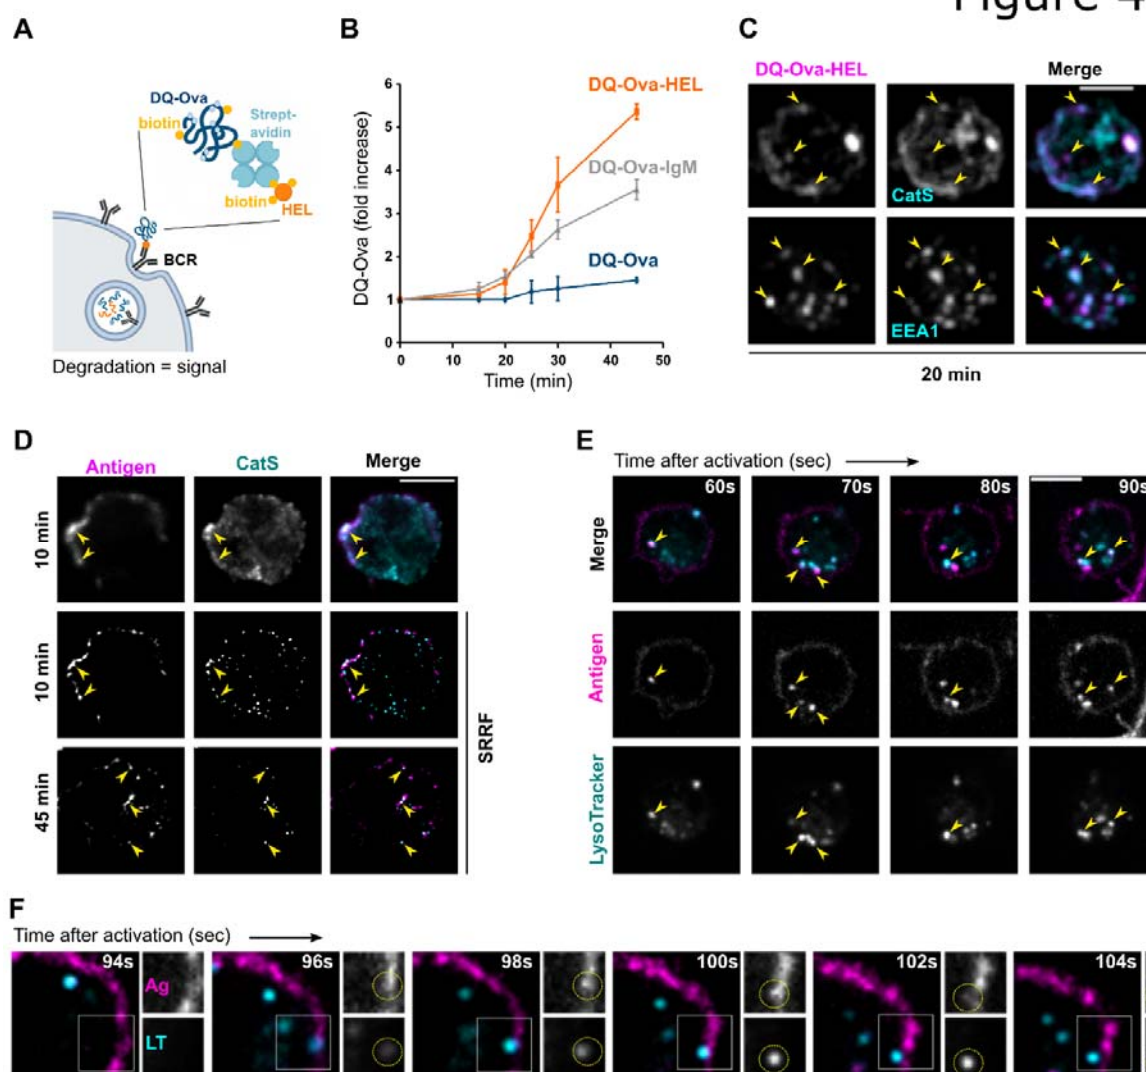

**Figure 4. Internalised antigen incorporates into vesicles with low pH and capability to degrade cargo.** **A** Schematic view of preparing DQ-Ova-antigen (HEL) sandwich to probe proteolysis of antigen internalised by the BCR. **B** DQ-Ova and DQ-Ova-antigen (αIgM or HEL) degradation assessed by flow cytometry. Cells were labelled as in A, washed, and incubated for different timepoints at 37°C and fluorescence of DQ-OVA was acquired immediately. Results are shown as fold increase (mean ±SD of the DQ-OVA intensity, normalized to the intensity at time zero). N>2 independent experiments. **C** A20 D1.3 cells activated with DQ-Ova-HEL (magenta) as in B, for 20 min, were immunostained for EEA1 or CatS (cyan). Images were acquired using SDCM with EVOLVE (EMCCD) camera. Z-projections of representative cells (n = 3 independent experiments) are shown with examples of colocalising vesicles pointed to with yellow arrow-heads. Scale bar 5 μm. **D** A20 D1.3 cells activated with AF647-αIgM (antigen, magenta) for 10 or 45 min and immunostained for CatS (cyan) were imaged with conventional SDCM (upper panel, single plane) or with iterative imaging to obtain SRRF super-resolution image (20-25 frames/plane) (middle and bottom panels). Examples of colocalising vesicles are pointed to with yellow arrowheads. Scale bar 5 μm. **E-F** A20 D1.3 were loaded with LysoTracker (cyan) and activated with AF488 F(ab')2-αIgM (antigen, magenta). Live-imaging was performed with SDCM with EVOLVE (EMCCD) camera every 2s (E) or 500 ms (F), starting as soon as possible after transition of the cells to 37°C under the microscope. (E) A timelapse from a representative cell is shown and examples of colocalising vesicles are pointed to with yellow arrowheads. Scale bar 5 μm. See supplementary Movie 2. (F) A timelapse of an example movie highlighting a probable fusion event between an internalising antigen vesicle and a LT vesicle (dashed yellow circle). A white square in the merge image (left) depicts the region of the split channel insets. See supplementary Movie 3.

## Figure 5

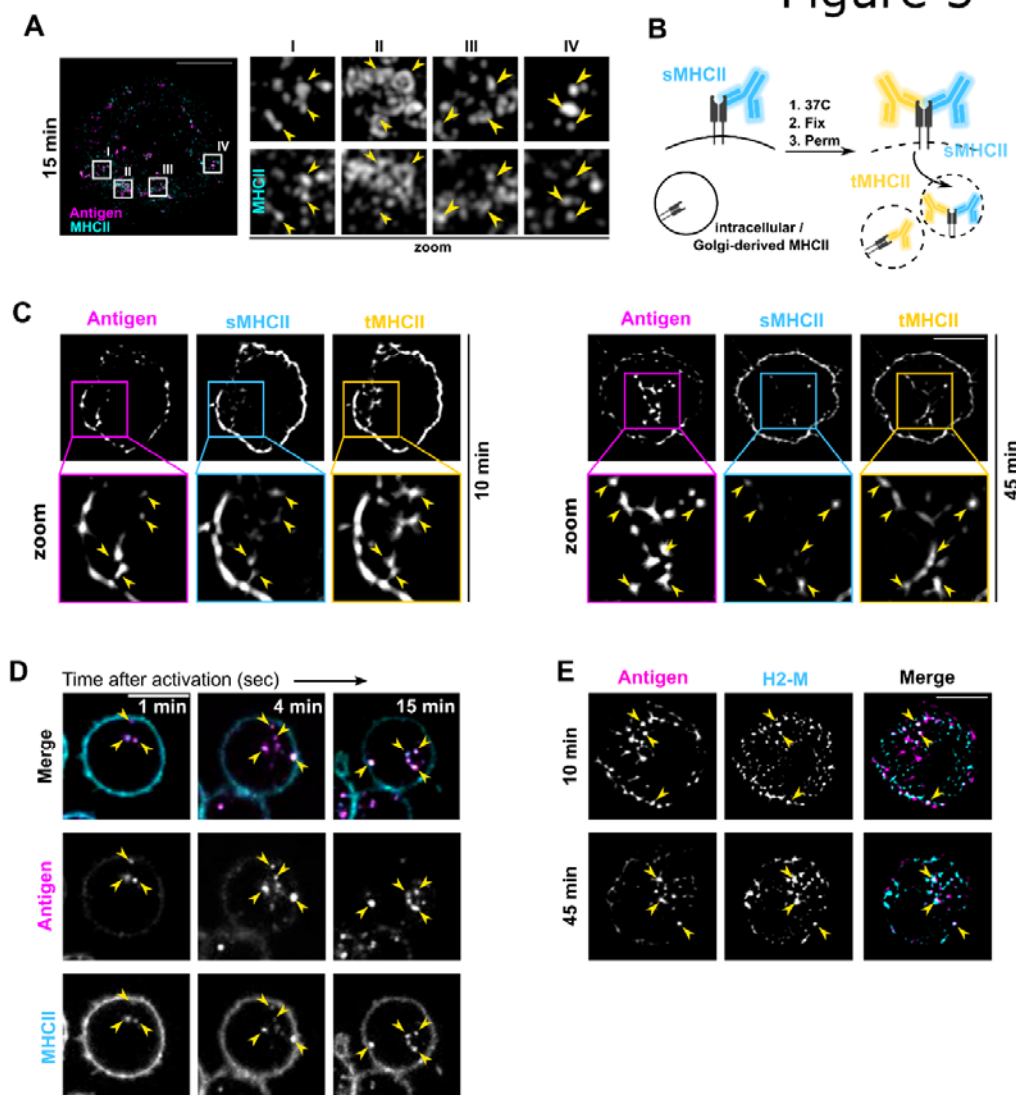

**Figure 5. Antigen and surface-derived MHCII rapidly converge after internalisation.** **A** SIM imaging of A20 D1.3 cells activated with AF647-αIgM (antigen, magenta) for 15 min and immunostained for MHC-II (cyan). A representative cell (stack image; 0.125 μm step size) is shown on the left with white squares indicating insets I-IV shown on panel on the right. Scale bar 5 μm. **B** A schematic view on the staining to distinguish surface-derived MHCII from the total pool, used in C-D. **C** A20 D1.3 cells (plane image; antigen in magenta) were stained with anti-MHCII antibodies (AF488) before activation with RRx-αIgM (antigen, magenta) to labelling surface-bound MHCII (sMHCII in cyan). After activation of 10 or 45 min at 37°C, cells were fixed and permeabilised to stain with anti-MHCII antibody and a secondary antibody (AF633; tMHCII, yellow). Samples were imaged with iterative imaging of a single plane with SDCM (20-25 frames/plane) and post-processed to obtain SRRF super-resolution image. The panel on top shows a representative cell with white square depicting the region for the zoom-in in the lower panel. Examples of colocalising vesicles are pointed to with yellow arrowheads. Scale bar 5 μm. **D** Live imaging of A20D1.3 stained on ice with AF488-anti-MHCII antibodies (cyan) and RRx-αIgM (antigen, magenta). Samples were imaged every 5 seconds using SDCM after 1 min at 37 °C (ORCA camera). A timelapse from a representative cell is shown and examples of colocalising vesicles are pointed to with yellow arrowheads. Scale bar 5 μm. See supplementary Movie 4. **E** SRRF imaging of A20 D1.3 cells activated with AF647-αIgM (antigen, magenta) for 10 or 45 min and immunostained for H2-M (cyan). A representative cell is shown and examples of colocalising vesicles are pointed to with yellow arrow-heads. Scale bar 5 μm.
